# Supplementary material for: First-in-class hydrazone–pyrazoline sensors for selective detection of Zn 2+ , Cd 2+ , and Hg 2+ in aqueous environments
Source: Royal Society of Chemistry journal article supplement (doi:10.1039/d5ay00639b), 2025-01-01
Supplement: d5ay00639b1.pdf [file d5ay00639b1.pdf]

## Electronic Supplementary Information (ESI)

First-in-class hydrazone-pyrazoline sensors for selective detection of  
 $\text{Zn}^{2+}$ ,  $\text{Cd}^{2+}$ , and  $\text{Hg}^{2+}$  in aqueous environments

Alexander Ciupa\*

### General Experimental

Chemicals, solvents and reagents were purchased from commercial sources and used without further purification. PE refers to petroleum ether, bp 40-60 °C. Spectroscopy was performed with CHROMASOLV® gradient grade acetonitrile for HPLC, ≥99.9%, from Sigma-Aldrich.

The metal complexes used in this study were: LiCl, NaCl, KCl, CaCl<sub>2</sub>, MgCl<sub>2</sub>, CuCl<sub>2</sub>, NiCl<sub>2</sub>, ZnCl<sub>2</sub>, CdCl<sub>2</sub>, RuCl<sub>3</sub>, CoCl<sub>2</sub>, MnCl<sub>2</sub>, PbCl<sub>2</sub>, ZnCl<sub>2</sub> and HgI<sub>2</sub>.

TLCs were carried out on Merck Aluminium backed TLC plates Silica Gel 60 F254 and viewed using UV light of wavelength 254 nm. Merck Silica Gel (0.040-0.063 mm) was used for column chromatography. Compounds were loaded as an oil, CH<sub>2</sub>Cl<sub>2</sub> solution or dry loaded by adsorption onto silica.

NMR spectra were obtained on a Bruker Avance III (400 MHz) spectrometer and processed via TopSpin® software. The chemical shifts are recorded in parts per million (ppm) with reference to tetramethylsilane. The coupling constants J are quoted to the nearest 0.5 Hz and are not corrected.

High resolution Mass spectroscopy was performed on Bruker Quadrupole Time-of-Flight (qToF) mass spectrometer.

UV/Vis spectroscopy was performed on an Agilent Cary5000 in quartz cuvettes with a 1 cm pathlength using HPLC grade MeCN, 250-500 nm range with 0.2 sec dwell time. Detector switchover occurred at 350 nm.

FTIR spectroscopy was performed on a Bruker VERTEX 70 spectrometer.

Fluorescence spectroscopy was performed on an Edinburgh Instruments FLS1000 with a xenon excitation source, 2 nm bandwidths for both excitation and emission monochromator, scan speed of 1 nm and dwell time of 0.2 sec. Fluorescence quartz cuvettes with a 1 cm pathlength were used throughout with HPLC grade MeCN.

A 100 Watt 365 nm Analytikjena High intensity UV lamp was used to image the sensors in cuvettes with 5.0 equivalent indicated metal, sensor concentration was 20 μM, solvent was MeCN.

All figures were plotted using SigmaPlot® 14.5 software.

## Preliminary Pyrazoline synthesis Screening (S1)

In our search for new pyrazoline and pyrazole fluorescent sensors, we synthesised pyrazoline 1 and pyrazole 2 below and discovered an unexpected 3<sup>rd</sup> product, the hydrazone pyrazoline (**P1**) which was isolated and discovered to have useful properties. While pyrazoline 1 and pyrazole did display “turn on” fluorescent properties, they are not the subject of this study and therefore will not be discussed further.

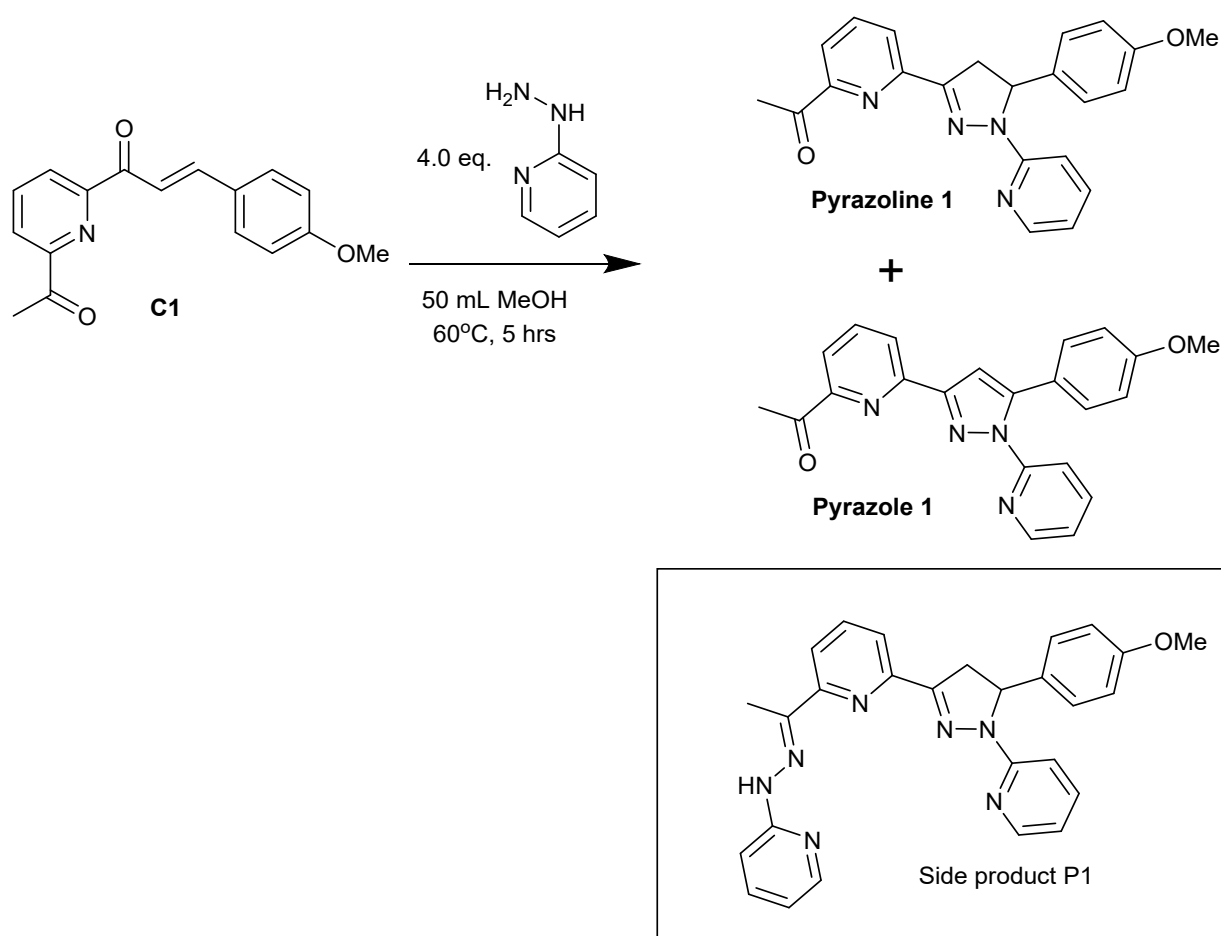

## General Synthesis (S2)

### Synthesis of chalcone **C1**

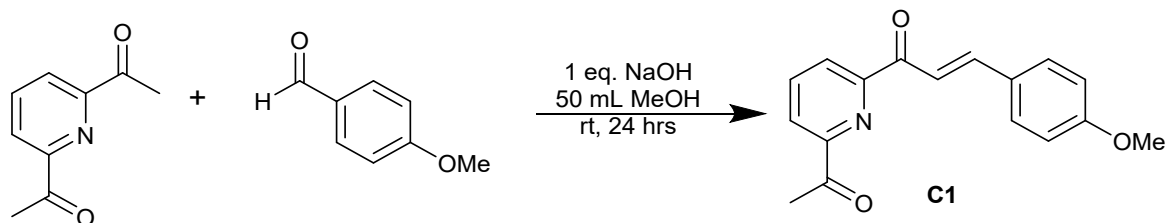

Using a method adapted from a previous synthesis (*RSC Adv.*, 2024, **14**, 3519-3524), 6 mmol 2,6-acetylpyridine was added to a stirred solution of 3.0 mmol aldehyde in MeOH followed by the addition of 3.0 mmol NaOH and stirring continued at room temperature. After 24 hours the precipitate was filtered, washed with copious amounts of cold H<sub>2</sub>O and collected and dried to afford the desired chalcone without further purification.

**Yield** 0.442g (52%);

**V<sub>max</sub>** (Solid)/cm<sup>-1</sup> 1701, 1666, 1216 and 952;

**<sup>1</sup>H NMR** δ<sub>H</sub> (400 MHz; CDCl<sub>3</sub>) 2.90 (3 H, s, CH<sub>3</sub>), 3.90 (3 H, s, OCH<sub>3</sub>), 6.98-7.00 (2 H, m, CH), 7.70-7.72 (2 H, m, CH), 7.98-8.06 (3 H, m, CH=CH and CH), 8.24-8.28 (2 H, m, CH=CH and CH) and 8.38-8.40 (1 H, m, CH);

**<sup>13</sup>C NMR** δ<sub>C</sub> (100 MHz; CDCl<sub>3</sub>) 25.8, 55.5, 114.5, 118.0, 124.4, 125.6, 126.1, 127.8, 130.5, 138.1, 145.1, 152.6, 161.9, 188.5 and 199.5;

**HRMS m/z (qToF)** Found 282.1152 (M+H<sup>+</sup>). C<sub>17</sub>H<sub>16</sub>NO<sub>3</sub> requires 282.1130.

Above in agreement with previous data from *RSC Adv.*, 2024, **14**, 3519-3524.

### Synthesis of chalcone **C2**

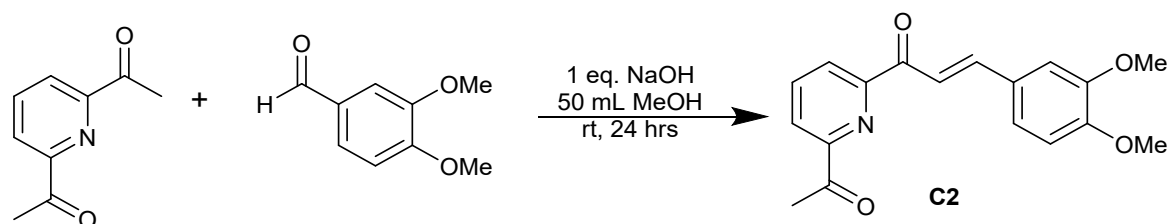

Using a method adapted from a previous synthesis (*RSC Adv.*, 2024, **14**, 3519-3524), 10 mmol 2,6-acetylpyridine was added to a stirred solution of 5.0 mmol aldehyde in MeOH followed by the addition of 5.0 mmol NaOH and stirring continued at room temperature. After 24 hours the precipitate was filtered, washed with copious amounts of cold H<sub>2</sub>O and collected and dried to afford the desired chalcone without further purification.

**Yield** 0.65g (41%);

**V<sub>max</sub>** (Solid)/cm<sup>-1</sup> 1593, 1512, 1429, 1162, 1072 and 991;

**<sup>1</sup>H NMR** δ<sub>H</sub> (400 MHz; CDCl<sub>3</sub>) 2.88 (3 H, s, CH<sub>3</sub>), 3.96 (3 H, s, CH<sub>3</sub>), 4.00 (3 H, s, CH<sub>3</sub>), 6.91-6.97 (1 H, m, CH), 7.24-7.27 (1 H, m, CH), 7.34-7.37 (1 H, m, CH), 7.98 (1 H, d, *J* = 16 Hz, CH=CH), 8.03-8.07 (1 H, m, CH), 8.21-8.26 (2 H, m, CH) and 8.38-8.40 (1 H, m, CH);

**<sup>13</sup>C NMR** δ<sub>C</sub> (100 MHz; CDCl<sub>3</sub>) 26.6, 55.9, 56.1, 110.6, 111.2, 118.3, 123.0, 124.5, 126.1, 128.1, 128.2, 145.4, 149.3, 151.7, 152.5, 153.6, 188.4 and 199.5;

**HRMS *m/z* (qToF)** Found 312.1356 (M+H<sup>+</sup>). C<sub>18</sub>H<sub>18</sub>NO<sub>4</sub> requires 312.1236.

### Synthesis of chalcone **C3**

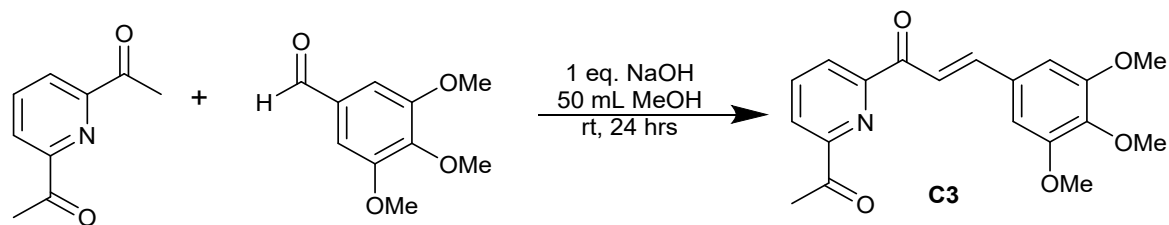

Using a method adapted from a previous synthesis (*RSC Adv.*, 2024, **14**, 3519-3524), 10 mmol 2,6-acetylpyridine was added to a stirred solution of 5.0 mmol aldehyde in MeOH followed by the addition of 5.0 mmol NaOH and stirring continued at room temperature. After 24 hours the precipitate was filtered, washed with copious amounts of cold H<sub>2</sub>O and collected and dried to afford the desired chalcone without further purification.

**Yield** 1.02g (60%);

**V<sub>max</sub>** (Solid)/cm<sup>-1</sup> 1699, 1593, 1430 and 1234;

**<sup>1</sup>H NMR** δ<sub>H</sub> (400 MHz; CDCl<sub>3</sub>) 2.88 (3 H, s, CH<sub>3</sub>), 3.94 (3 H, s, CH<sub>3</sub>), 3.96 (6 H, s, CH<sub>3</sub>), 6.98 (2 H, s, CH), 7.94 (1 H, d, *J* = 16 Hz, CH=CH), 8.06 (1 H, t, *J* = 7.6 Hz, CH), 8.24-8.28 (2 H, m, CH), 8.38-8.40 (1 H, m, CH);

**<sup>13</sup>C NMR** δ<sub>C</sub> (100 MHz; CDCl<sub>3</sub>) 25.6, 56.2, 61.1, 105.9, 119.7, 124.6, 126.1, 130.5, 138.2, 140.8, 145.3, 152.4, 153.4, 153.5, 188.4 and 199.3;

**HRMS m/z (qToF)** Found 342.1461 (M+H<sup>+</sup>). C<sub>19</sub>H<sub>20</sub>NO<sub>5</sub> requires 342.1341.

#### Synthesis of chalcone **C4**

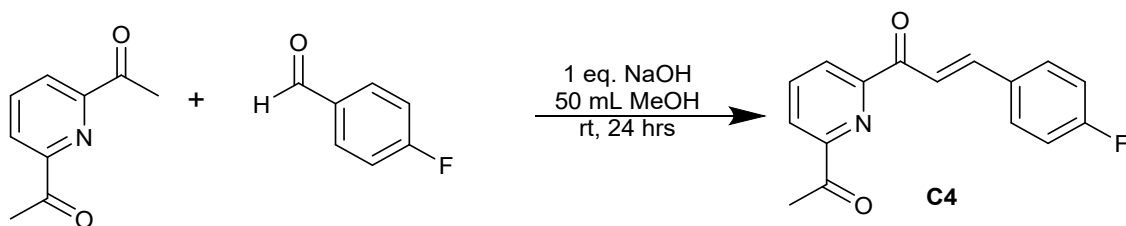

Using a method adapted from a previous synthesis (*RSC Adv.*, 2024, **14**, 3519-3524), 6 mmol 2,6-acetylpyridine was added to a stirred solution of 3.0 mmol aldehyde in MeOH followed by the addition of 3.0 mmol NaOH and stirring continued at room temperature. After 24 hours the precipitate was filtered, washed with copious amounts of cold H<sub>2</sub>O and collected and dried to afford the desired chalcone without further purification.

**Yield** 0.174g (22%);

**V<sub>max</sub>** (Solid)/cm<sup>-1</sup> 1593, 1439, 1257 and 1138;

**<sup>1</sup>H NMR** δ<sub>H</sub> (400 MHz; CDCl<sub>3</sub>) 2.90 (3 H, s, CH<sub>3</sub>), 7.15-7.19 (2 H, m, CH), 7.72-7.76 (2 H, m, CH), 7.98 (1 H, d, *J* = 16.0 Hz, CH=CH), 8.04-8.08 (1 H, m, CH), 8.26-8.32 (2 H, m, CH) and 8.38-8.41 (1 H, m, CH);

**<sup>13</sup>C NMR** δ<sub>C</sub> (100 MHz; CDCl<sub>3</sub>) 25.8, 116.1, 116.3, 120.0, 124.7, 126.2, 130.6, 138.2, 143.9, 143.9, 152.6, 153.3, 163.1, 165.5, 188.4 and 199.3;

**HRMS m/z (qToF)** Found 270.1068 (M+H<sup>+</sup>). C<sub>16</sub>H<sub>13</sub>FNO<sub>2</sub> requires 270.0930.

## Synthesis of pyrazoline **P1**

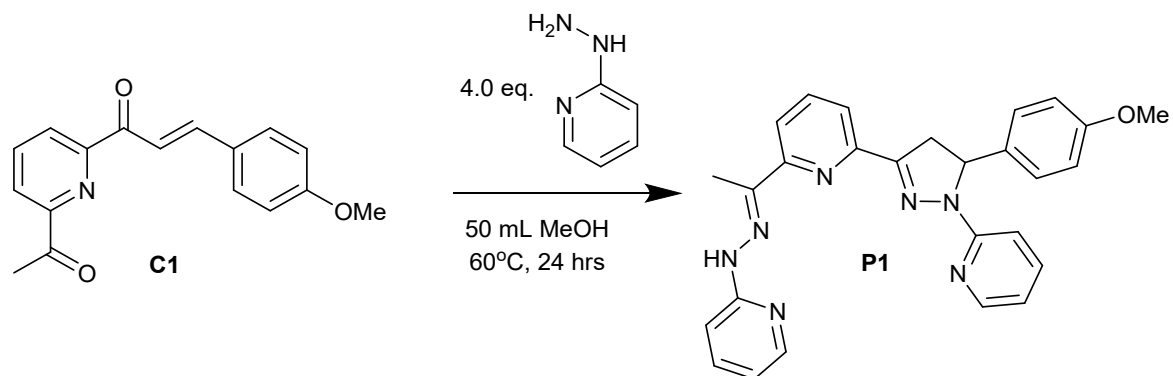

4.0 mmol of 2-hydrazinopyridine was added to a stirred solution of 1.0 mmol **C1** in 50 mL MeOH and heated to 60 °C. After 24 hours the solvent was removed under reduced pressure, 100 mL H<sub>2</sub>O added and extracted into 3 x 50 mL EtOAc. The EtOAc fractions were combined and the solvent removed under reduced pressure to give an oil which was then purified by column chromatography 6:4 EtOAc: PE to afford the desired product.

**Yield** 0.23g (50%);

**V<sub>max</sub>** (Solid)/cm<sup>-1</sup> 1494, 1454, 847 and 664;

**<sup>1</sup>H NMR** δ<sub>H</sub> (400 MHz; CDCl<sub>3</sub>) 2.30 (3 H, s, CH<sub>3</sub>), 3.32-3.38 (1 H, m, CH), 3.68 (3 H, s, OCH<sub>3</sub>), 3.82-3.90 (1 H, m, CH), 5.67-5.72 (1 H, m, CH), 5.69-5.72 (1 H, m, CH), 6.56-6.60 (1 H, m, CH), 6.74-6.76 (3 H, Ar CH and CH), 7.15-7.18 (2 H, m, Ar CH and CH), 7.34-7.37 (2 H, m, CH), 7.42-7.44 (1 H, m, CH), 7.56-7.63 (3 H, m, CH), 7.96-8.02 (3 H, m, CH), 8.07-8.08 (1 H, m, CH), 8.21 (1 H, Br s, NH);

**<sup>13</sup>C NMR** δ<sub>C</sub> (100 MHz; CDCl<sub>3</sub>) 42.5, 55.2, 61.6, 107.7, 109.1, 114.0, 114.7, 116.3, 119.1, 119.5, 127.1, 130.5, 135.4, 136.0, 137.1, 138.3, 144.2, 147.7, 150.5, 151.2, 155.3, 156.6 and 158.6;

**HRMS m/z (qToF)** Found 464.2219 (M+H<sup>+</sup>). C<sub>27</sub>H<sub>26</sub>N<sub>7</sub>O requires 464.2199.

## Synthesis of pyrazoline **P2**

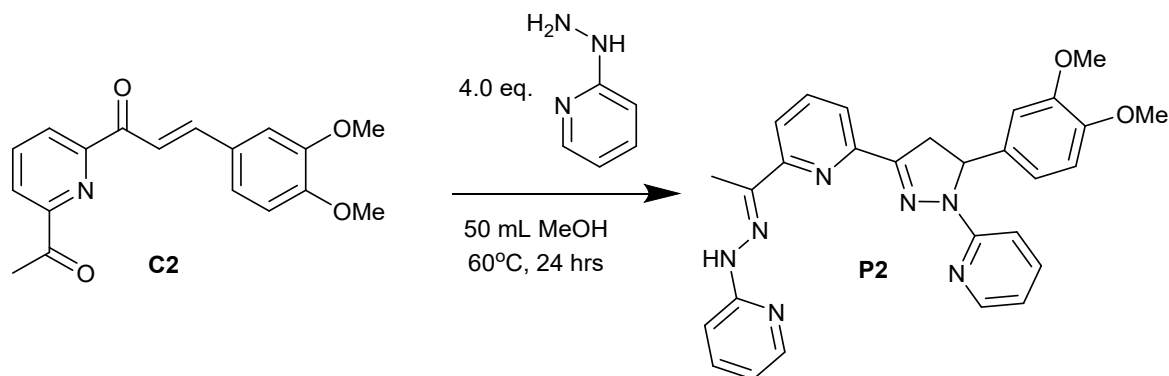

4.0 mmol of 2-hydrazinopyridine was added to a stirred solution of 1.0 mmol **C2** in 50 mL MeOH and heated to 60 °C. After 24 hours the solvent was removed under reduced pressure, 100 mL H<sub>2</sub>O added and extracted into 3 x 50 mL EtOAc. The EtOAc fractions were combined and the solvent removed under reduced pressure to give an oil which was then purified by column chromatography 6:4 EtOAc: PE to afford the desired product.

**Yield** 0.21g (43%);

**V<sub>max</sub>** (Solid)/cm<sup>-1</sup> 2926, 1592, 1511, 1432, 1257 and 1234;

**<sup>1</sup>H NMR** δ<sub>H</sub> (400 MHz; CDCl<sub>3</sub>) 2.40 (3 H, s, CH<sub>3</sub>), 3.43-3.49 (1 H, m, CH), 3.85 (6 H, s, CH<sub>3</sub>), 3.99-4.01 (1 H, m, CH), 5.75-7.80 (1 H, m, CH), 6.69-6.80 (1 H, m, CH), 6.81-6.87 (5 H, m, CH), 7.45-7.47 (3 H, m, CH), 7.53-7.55 (1 H, m, CH), 7.66-7.74 (1 H, m, CH), 8.11-8.12 (3 H, m, CH), 8.18- 8.19 (1 H, m, CH), 8.25 (1 H, br s, NH);

**<sup>13</sup>C NMR** δ<sub>C</sub> (100 MHz; CDCl<sub>3</sub>) 42.5, 55.9, 62.0, 65.9, 107.7, 109.1, 109.2, 111.3, 114.85, 116.3, 117.8, 119.5, 121.9, 123.1, 135.9, 136.0, 137.1, 138.2, 144.0, 144.6, 147.8, 147.9, 148.0, 149.1, 150.5, 151.26, 155.3 and 156.6;

**HRMS m/z (qToF)** Found 494.2349 (M+H<sup>+</sup>). C<sub>28</sub>H<sub>28</sub>N<sub>7</sub>O<sub>2</sub> requires 494.2304.



### Synthesis of pyrazoline **P3**

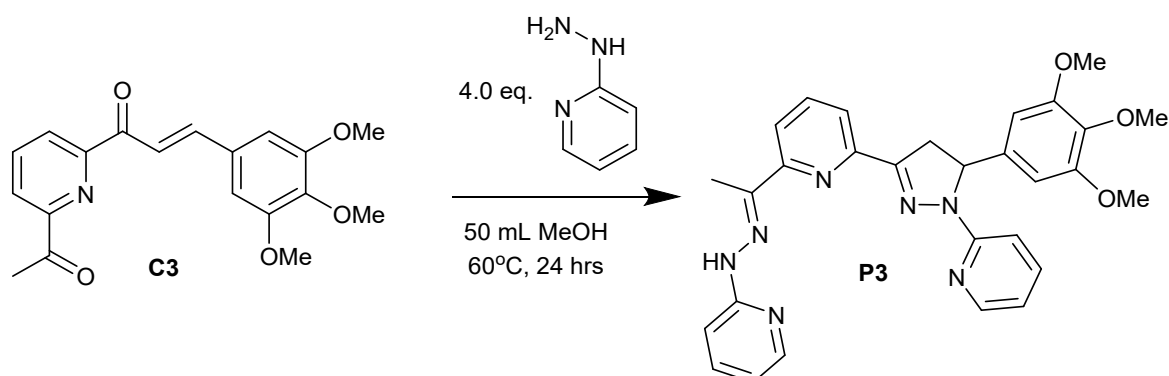

4.0 mmol of 2-hydrazinopyridine was added to a stirred solution of 1.0 mmol **C3** in 50 mL MeOH and heated to 60 °C. After 24 hours the solvent was removed under reduced pressure, 100 mL H<sub>2</sub>O added and extracted into 3 x 50 mL EtOAc. The EtOAc fractions were combined and the solvent removed under reduced pressure to give an oil which was then purified by column chromatography 6:4 EtOAc: PE to afford the desired product.

**Yield** 0.320g (61%);

**V<sub>max</sub>** (Solid)/cm<sup>-1</sup> 2928, 1592, 1432, 1257, 1161 and 1137;

**<sup>1</sup>H NMR** δ<sub>H</sub> (400 MHz; CDCl<sub>3</sub>) 2.41 (3 H, s, CH<sub>3</sub>), 3.42-3.48 (1 H, m, CH), 3.82 (9 H, s, CH<sub>3</sub>), 3.99-4.15 (1 H, m, CH), 5.32-5.78 (1 H, m, CH), 6.53 (2 H, s, CH), 6.72-6.73 (1 H, m, CH), 6.83-6.86 (1 H, m, CH), 7.44-7.49 (2 H, m, CH), 7.55-7.59 (1 H, m, CH), 7.65-7.68 (1 H, m, CH), 7.72-7.76 (1 H, m, CH), 8.09-8.150 (3 H, m, CH), 8.18-8.20 (1 H, m, CH) and 8.25 (1 H, br s, NH);

**<sup>13</sup>C NMR** δ<sub>C</sub> (100 MHz; CDCl<sub>3</sub>) 42.6, 56.1, 60.8, 62.4, 102.5, 107.7, 109.2, 114.9, 116.4, 119.3, 119.5, 136.9, 137.2, 138.2, 139.0, 143.9, 147.8, 147.9, 150.4, 151.4, 153.5, 155.3, 155.4 and 156.6;

**HRMS m/z (qToF)** Found 524.6547 (M+H<sup>+</sup>). C<sub>29</sub>H<sub>30</sub>N<sub>7</sub>O<sub>3</sub> requires 524.6050.

### Synthesis of pyrazoline **P4**

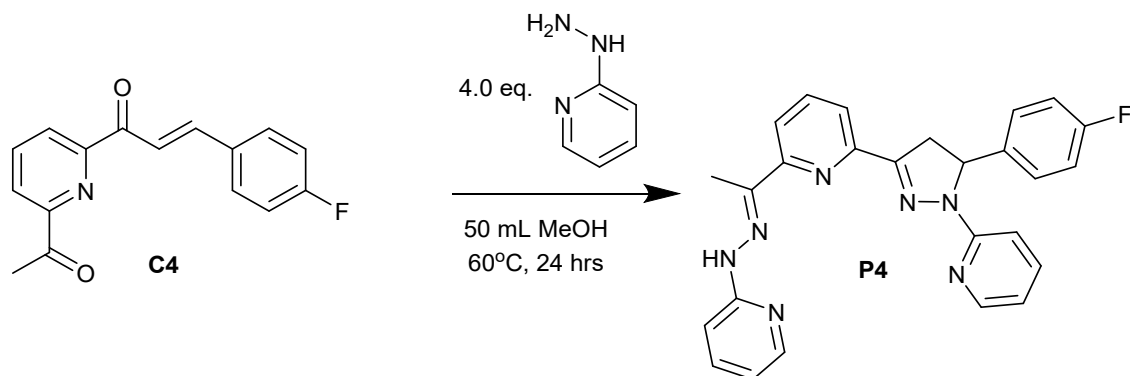

2.2 mmol of hydrazine was added to a stirred solution of 0.55 mmol **C4** in 50 mL MeOH and heated to  $60^\circ\text{C}$ . After 24 hours the solvent was removed under reduced pressure, 100 mL  $\text{H}_2\text{O}$  added and extracted into 3 x 50 mL EtOAc. The EtOAc fractions were combined and the solvent removed under reduced pressure to give an oil which was then purified by column chromatography 6:4 EtOAc: PE to afford the desired product.

**Yield** 0.06g (24%);

**Vmax** (Solid)/ $\text{cm}^{-1}$  2927, 1592, 1432, 1257 and 1138;

**$^1\text{H}$  NMR**  $\delta_{\text{H}}$  (400 MHz;  $\text{CDCl}_3$ ) 2.30 (3 H, s,  $\text{CH}_3$ ), 3.30-3.34 (1 H, m, CH), 3.85-3.92 (1 H, m, CH), 5.72-5.74 (1 H, m, CH), 6.57-6.59 (1 H, m, CH), 6.74-7.77 (1 H, m, CH), 6.87-8.91 (2 H, m, CH), 7.19-7.21 (1 H, m, CH), 7.33-7.39 (2 H, m, CH), 7.40-7.45 (1 H, m, CH), 7.55-7.56 (1 H, m, CH), 7.62-7.66 (1 H, m, CH), 7.96-8.09 (3 H, m, CH), 8.08-8.09 (1 H, m, CH) and 8.13 (1 H, br s, NH);

**$^{13}\text{C}$  NMR**  $\delta_{\text{C}}$  (100 MHz;  $\text{CDCl}_3$ ); 42.4, 61.5, 107.7, 109.2, 114.9, 115.4, 115.6, 116.3, 119.3, 119.5, 127.5, 127.6, 136.0, 137.1, 138.2, 144.0, 147.7, 150.4, 151.1, 155.2, 155.3 and 156.6;

**HRMS  $m/z$  (qToF)** Found 452.2185 ( $\text{M}+\text{H}^+$ ).  $\text{C}_{26}\text{H}_{23}\text{FN}_2$  requires 452.5174.

## Synthesis of pyrazoline **P5**

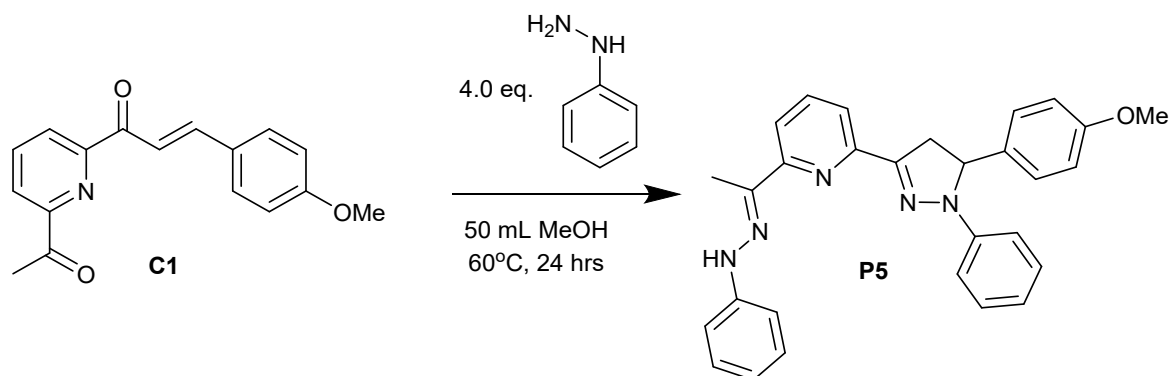

4.0 mmol of phenylhydrazine was added to a stirred solution of 1.0 mmol **C1** in 50 mL MeOH and heated to 60 °C. After 24 hours the solvent was removed under reduced pressure, 100 mL H<sub>2</sub>O added and extracted into 3 x 50 mL EtOAc. The EtOAc fractions were combined and the solvent removed under reduced pressure to give an oil which was then purified by column chromatography 6:4 EtOAc: PE to afford the desired product.

**Yield** 0.09g (21%);

**V<sub>max</sub>** (Solid)/cm<sup>-1</sup> 2928, 1595, 1434 and 1244;

**<sup>1</sup>H NMR** δ<sub>H</sub> (400 MHz; CDCl<sub>3</sub>) 2.37 (3 H, s, CH<sub>3</sub>), 3.35-3.41 (1 H, m, CH), 3.81 (3 H, s, CH<sub>3</sub>), 3.99-4.06 (1 H, m, CH), 5.20-5.23 (1 H, m, CH), 6.83-6.93 (4 H, m, CH), 7.12-7.22 (2 H, m, CH), 7.23-7.24 (5 H, m, CH), 7.27-7.35 (3 H, m, CH), 7.54-7.57 (1 H, m, CH), 7.70-7.29 (1 H, m, CH), 8.04-8.10 (1 H, m, CH) and 8.10- 8.12 (1 H, m, CH);

**<sup>13</sup>C NMR** δ<sub>C</sub> (100 MHz; CDCl<sub>3</sub>); 43.5, 55.3, 64.2, 113.3, 113.6, 114.5, 118.7, 118.9, 119.4, 120.6, 122.4, 127.1, 128.9, 129.3, 134.8, 135.9, 142.1, 144.6, 148.7, 150.7, 155.6 and 159.0;

**HRMS m/z (qToF)** Found 432.5376 (M+H<sup>+</sup>). C<sub>28</sub>H<sub>26</sub>N<sub>5</sub> requires 432.5510.

### Synthesis of pyrazoline **P6**

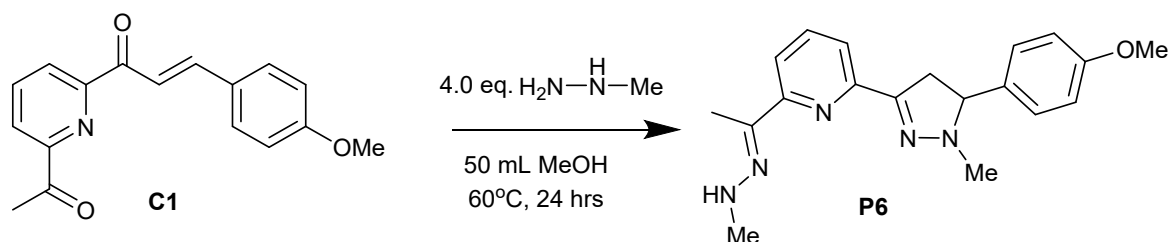

4.0 mmol of methylhydrazine was added to a stirred solution of 1.0 mmol **C1** in 50 mL MeOH and heated to 60 °C. After 24 hours the solvent was removed under reduced pressure, 100 mL  $\text{H}_2\text{O}$  added and extracted into 3 x 50 mL EtOAc. The EtOAc fractions were combined and the solvent removed under reduced pressure to give an oil which was then purified by column chromatography 6:4 EtOAc: PE to afford the desired product.

**Yield** 0.06g (18%);

**Vmax** (Solid)/ $\text{cm}^{-1}$  2921, 1165, 1341 and 1141;

**$^1\text{H}$  NMR**  $\delta_{\text{H}}$  (400 MHz;  $\text{CDCl}_3$ ) 2.20 (3 H, s,  $\text{CH}_3$ ), 2.89 (3 H, s,  $\text{CH}_3$ ), 1.90 (1 H, m, CH), 3.72 (3 H, s,  $\text{CH}_3$ ), 3.85 (1 H, m, CH), 3.98 (1 H, m, CH), 5.20 (1 H, br s, NH), 6.93-6.95 (2 H, m, CH), 7.41-7.43 (2 H, m, CH), 7.62 (1 H, m, CH), 7.81-7.82 (1 H, m, CH) and 7.61-7.93 (1 H, br s, NH);

**$^{13}\text{C}$  NMR**  $\delta_{\text{C}}$  (100 MHz;  $\text{CDCl}_3$ ); 41.2, 42.9, 55.3, 114.0, 114.1, 114.4, 118.4, 118.4, 118.5, 118.9, 120.3, 121.1, 122.6, 130.4, 132.4, 151.6 and 159.3;

**HRMS  $m/z$  (qToF)** Found 338.4387 ( $\text{M}+\text{H}^+$ ).  $\text{C}_{19}\text{H}_{24}\text{N}_5\text{O}$  requires 338.4350.

# NMR Spectra (S3)

C1  
PROTON16.CMDnp CDCl3 {C:\Bruker\TopSpin3.6.5} nmrsu 62

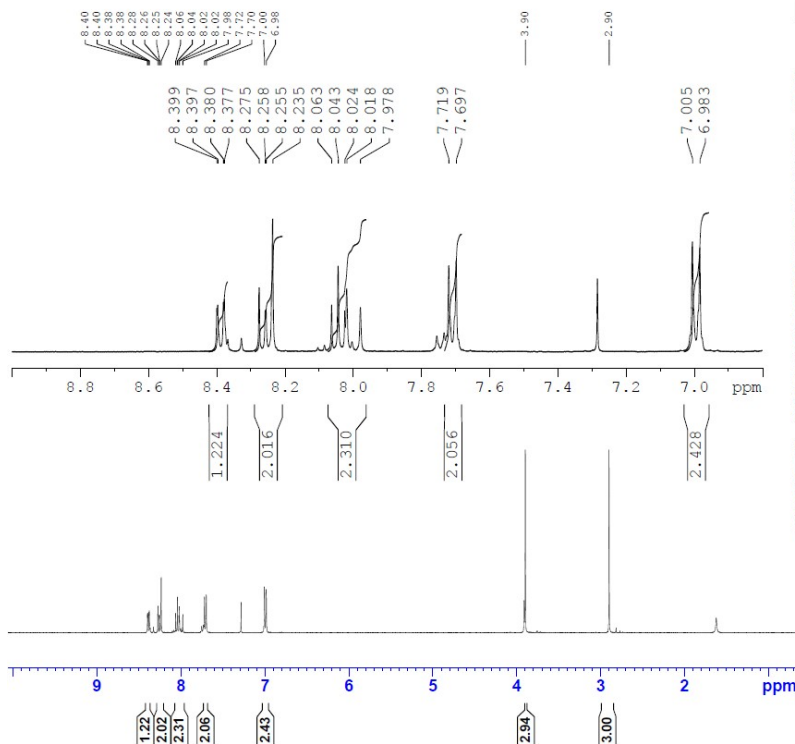

<sup>1</sup>H NMR (400 Mhz) of C1 in CDCl<sub>3</sub>

C1  
C13CPD512.CMDnp CDCl3 {C:\Bruker\TopSpin3.6.5} nmrsu 62

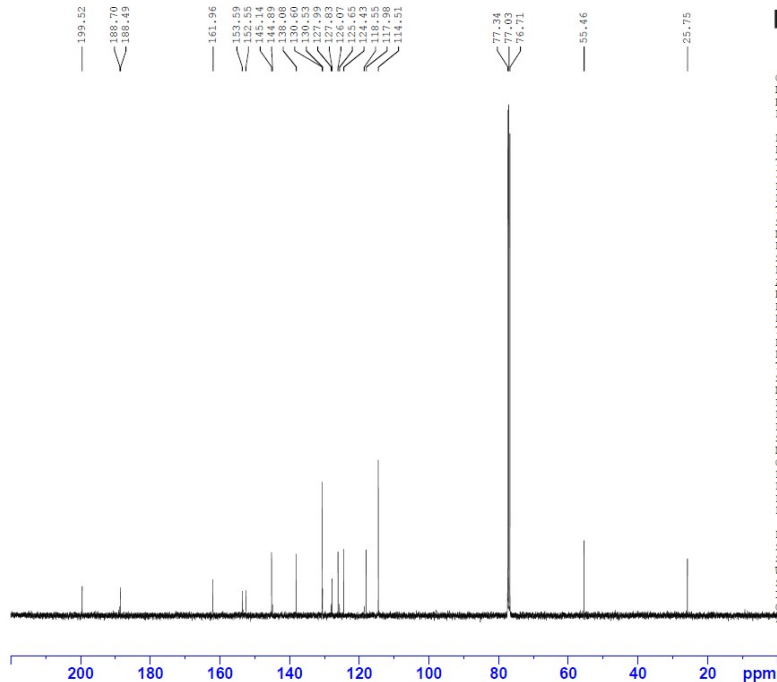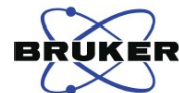

Current Data Parameters  
NAME Dec19-2024-Alex  
EXPNO 10  
PROCNO 1

F2 - Acquisition Parameters  
Date\_ 20241219  
Time 8.30 h  
INSTRUM av400  
PROBHD Z104450\_0135 (zgpg30)  
PULPROG zgpg30  
TD 65536  
SOLVENT CDCl3  
NS 16  
DS 2  
SWH 6410.256 Hz  
FIDRES 0.195625 Hz  
AQ 5.1118078 sec  
RG 209.43  
DW 78.000 usec  
DE 6.50 usec  
TE 298.2 K  
D1 1.00000000 sec  
TD0 1  
SF01 400.1924011 MHz  
NUC1 1H  
FO 5.00 usec  
PI 15.00 usec  
PLW1 11.09700012 W

F2 - Processing parameters  
SI 32768  
SF 400.1900000 MHz  
WDW EM  
SSB 0  
LB 0.30 Hz  
GB 0  
PC 1.00

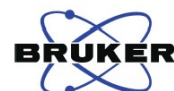

Current Data Parameters  
NAME Dec19-2024-Alex  
EXPNO 20  
PROCNO 1

F2 - Acquisition Parameters  
Date\_ 20241219  
Time 9.04 h  
INSTRUM av400  
PROBHD Z104450\_0135 (zgpg30)  
PULPROG zgpg30  
TD 65536  
SOLVENT CDCl3  
NS 512  
DS 4  
SWH 23148.148 Hz  
FIDRES 0.706425 Hz  
AQ 1.4155777 sec  
RG 209.43  
DW 21.600 usec  
DE 6.50 usec  
TE 298.2 K  
D1 2.00000000 sec  
D11 0.03000000 sec  
TD0 1  
SF01 100.6384215 MHz  
NUC1 13C  
FO 3.33 usec  
PI 10.00 usec  
PLW1 47.94699860 W  
SF02 400.1916008 MHz  
NUC2 1H  
CPDPRG12 waltz16  
PCPD2 90.00 usec  
PLW2 11.09700012 W  
PLW12 0.30825001 W  
PLW13 0.15504999 W

F2 - Processing parameters  
SI 32768  
SF 100.6278555 MHz  
WDW EM  
SSB 0  
LB 1.00 Hz  
GB 0  
PC 1.40

<sup>13</sup>C NMR (100 Mhz) of **C1** in CDCl<sub>3</sub>

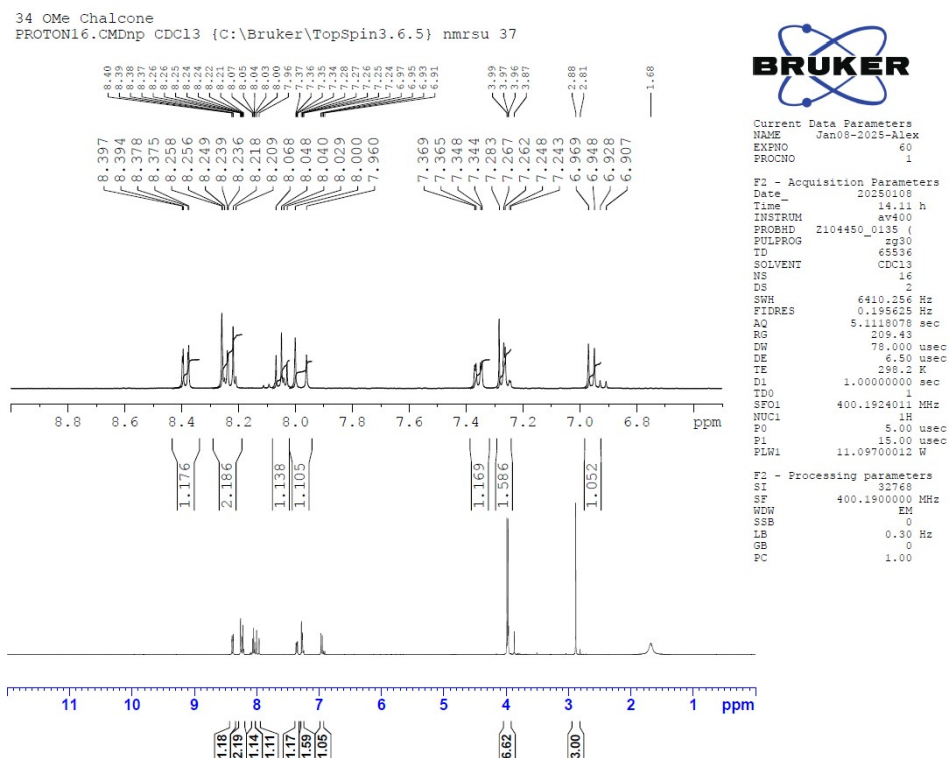

<sup>1</sup>H NMR (400 Mhz) of **C2** in CDCl<sub>3</sub>

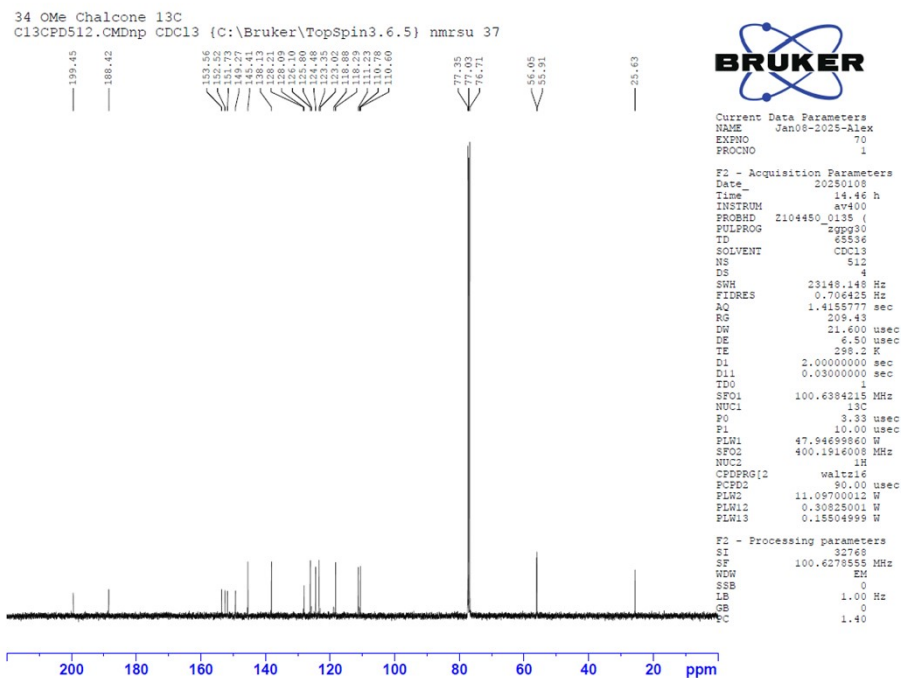

<sup>13</sup>C NMR (100 Mhz) of **C2** in CDCl<sub>3</sub>

345 OMe Chalcone  
 PROTON16.CMDnp CDCl3 {C:\Bruker\TopSpin3.6.5} nmrsu 94

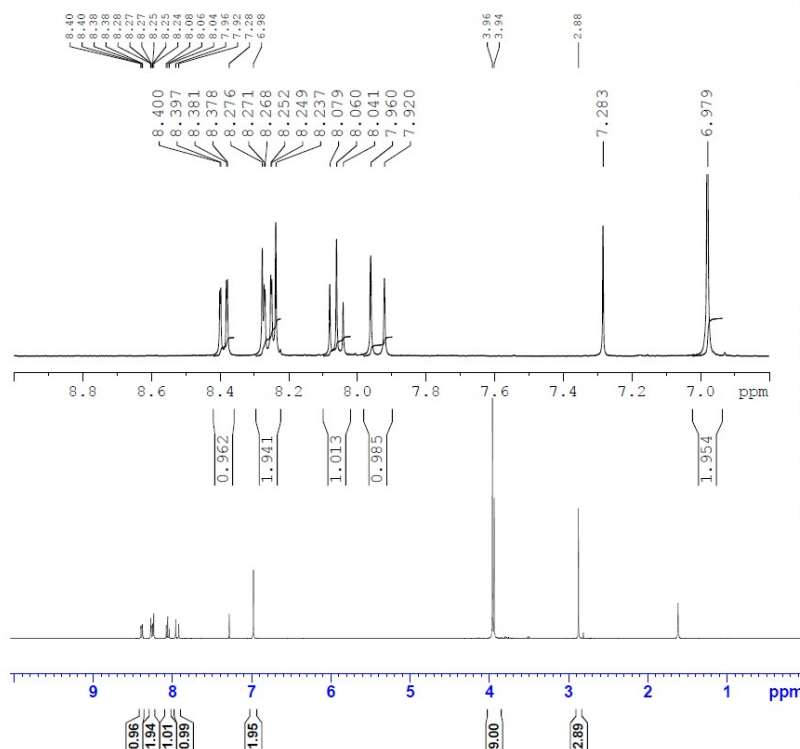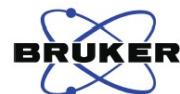

Current Data Parameters  
 NAME Jan07-2025-Alex  
 EXPNO 10  
 PROCNO 1

F2 - Acquisition Parameters  
 Date 20250107  
 Time 12.28 h  
 INSTRUM av400  
 PROBHD Z104450\_0135 ( )  
 PULPROG zg30  
 TD 65536  
 SOLVENT CDCl3  
 NS 16  
 DS 2  
 SWH 6410.256 Hz  
 FIDRES 0.195625 Hz  
 AQ 5.1118078 sec  
 RG 209.43  
 DW 78.000 usec  
 DE 6.50 usec  
 TE 298.2 K  
 D1 1.00000000 sec  
 TDO 1  
 SFO1 400.1924011 MHz  
 NUC1 1H  
 P0 5.00 usec  
 P1 15.00 usec  
 PLW1 11.09700012 W

F2 - Processing parameters  
 SI 32768  
 SF 400.1900000 MHz  
 WDW EM  
 SSB 0  
 LB 0.30 Hz  
 GB 0  
 PC 1.00

<sup>1</sup>H NMR (400 Mhz) of **C3** in CDCl<sub>3</sub>

345 OMe Chalcone 13C  
 C13CPD512.CMDnp CDCl3 {C:\Bruker\TopSpin3.6.5} nmrsu 94

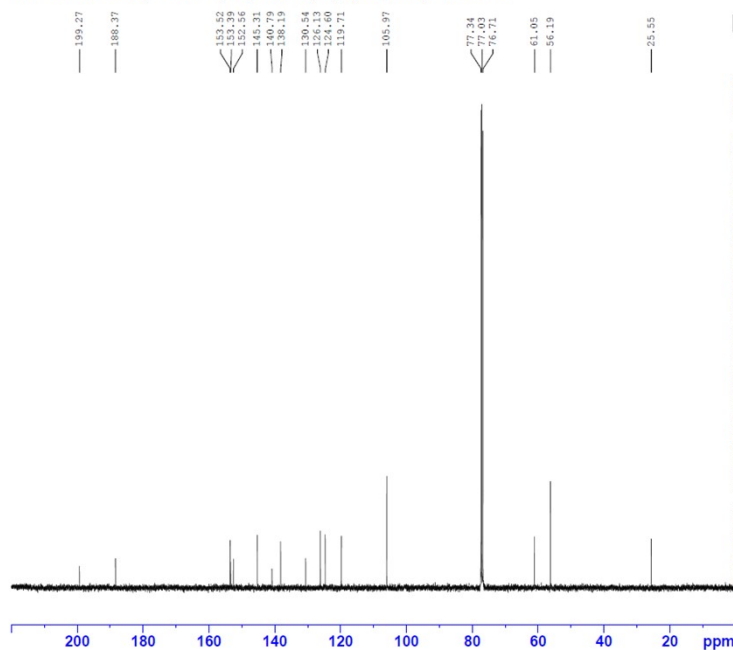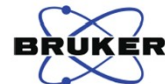

Current Data Parameters  
 NAME Jan07-2025-Alex  
 EXPNO 30  
 PROCNO 1

F2 - Acquisition Parameters  
 Date 20250107  
 Time 13.18 h  
 INSTRUM av400  
 PROBHD Z104450\_0135 ( )  
 PULPROG zgpg30  
 TD 65536  
 SOLVENT CDCl3  
 NS 512  
 DS 4  
 SWH 23148.148 Hz  
 FIDRES 0.706425 Hz  
 AQ 1.4155777 sec  
 RG 209.43  
 DW 21.600 usec  
 DE 6.50 usec  
 TE 298.2 K  
 D1 2.00000000 sec  
 D11 0.03000000 sec  
 TDO 1  
 SFO1 100.6384215 MHz  
 NUC1 13C  
 P0 3.33 usec  
 P1 10.00 usec  
 PLW1 47.94699860 W  
 SFO2 400.1916008 MHz  
 NUC2 1H  
 CPDPRG2 waltz16  
 PCPD2 90.00 usec  
 PLW2 11.09700012 W  
 PLW12 0.30825001 W  
 PLW13 0.15504999 W

F2 - Processing parameters  
 SI 32768  
 SF 100.6278555 MHz  
 WDW EM  
 SSB 0  
 LB 1.00 Hz  
 GB 0  
 PC 1.40

<sup>13</sup>C NMR (100 Mhz) of **C3** in CDCl<sub>3</sub>

4F Chalcone  
 PROTON16.CMDnp CDC13 {C:\Bruker\TopSpin3.6.5} nmrsu 91

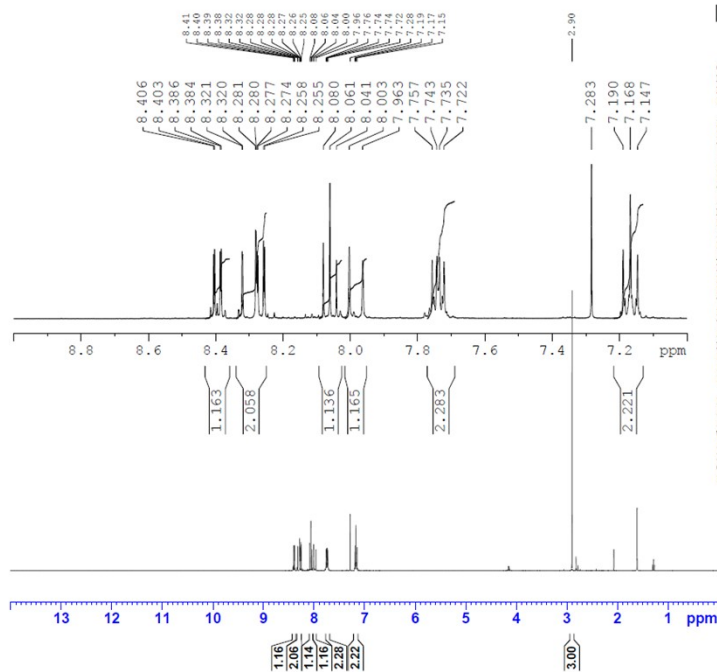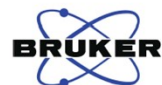

Current Data Parameters  
 NAME Jan09-2025-Alex  
 EXPNO 50  
 PROCNO 1

F2 - Acquisition Parameters  
 Date 20250109  
 Time 12.48 h  
 INSTRUM av400  
 PROBHD Z104450\_0135  
 PULPROG zgpg30  
 ID 65536  
 SOLVENT CDC13  
 NS 16  
 DS 2  
 SWH 6410.256 Hz  
 FIDRES 0.195625 Hz  
 AQ 5.1118078 sec  
 RG 209.43  
 DW 78.000 usec  
 DE 6.50 usec  
 TE 298.2 K  
 D1 1.00000000 sec  
 ID0 1  
 SF01 400.1924011 MHz  
 NUC1 1H  
 P0 5.00 usec  
 P1 15.00 usec  
 PLW1 11.09700012 W

F2 - Processing parameters  
 SI 32768  
 SF 400.1900000 MHz  
 WDW EM  
 SSB 0  
 LB 0.30 Hz  
 GB 0  
 PC 1.00

<sup>1</sup>H NMR (400 Mhz) of **C4** in CDCl<sub>3</sub>

4F chalcone 13C  
 C13CPD512.CMDnp CDC13 {C:\Bruker\TopSpin3.6.5} nmrsu 91

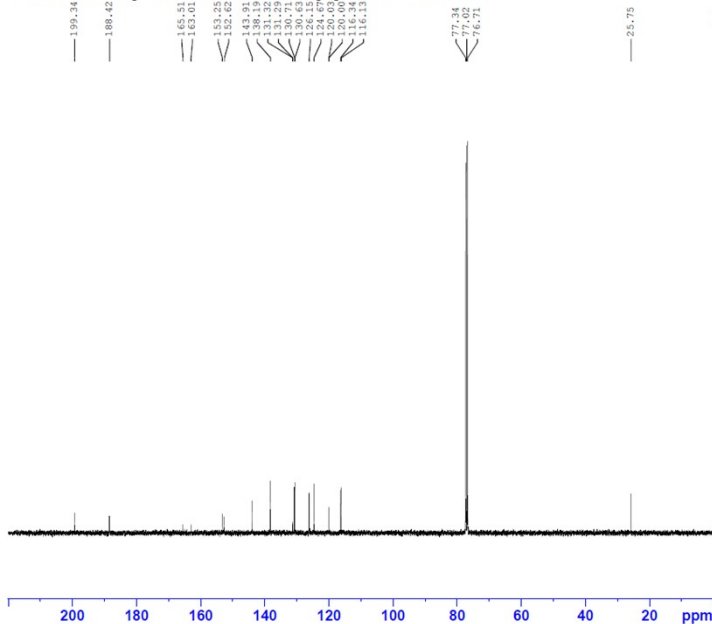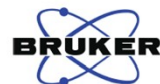

Current Data Parameters  
 NAME Jan09-2025-Alex  
 EXPNO 60  
 PROCNO 1

F2 - Acquisition Parameters  
 Date 20250109  
 Time 13.27 h  
 INSTRUM av400  
 PROBHD Z104450\_0135  
 PULPROG zgpg30  
 ID 65536  
 SOLVENT CDC13  
 NS 512  
 DS 1  
 SWH 23148.148 Hz  
 FIDRES 0.706425 Hz  
 AQ 1.4155777 sec  
 RG 209.43  
 DW 21.600 usec  
 DE 6.50 usec  
 TE 298.2 K  
 D1 2.00000000 sec  
 D11 0.03000000 sec  
 ID0 1  
 SF01 100.6394215 MHz  
 NUC1 13C  
 P0 3.33 usec  
 P1 10.00 usec  
 PLW1 47.94699860 W  
 SF02 400.1916008 MHz  
 NUC2 1H  
 CPDPRG2 waltz16  
 PCPD2 90.00 usec  
 PLW2 11.09700012 W  
 PLW12 0.30825001 W  
 PLW13 0.15504999 W

F2 - Processing parameters  
 SI 32768  
 SF 100.6278555 MHz  
 WDW EM  
 SSB 0  
 LB 1.00 Hz  
 GB 0  
 PC 1.40

<sup>13</sup>C NMR (100 Mhz) of **C4** in CDCl<sub>3</sub>



PROTON16.CMDnp CDCl3 {C:\Bruker\TopSpin3.6.5} nmrsu 15

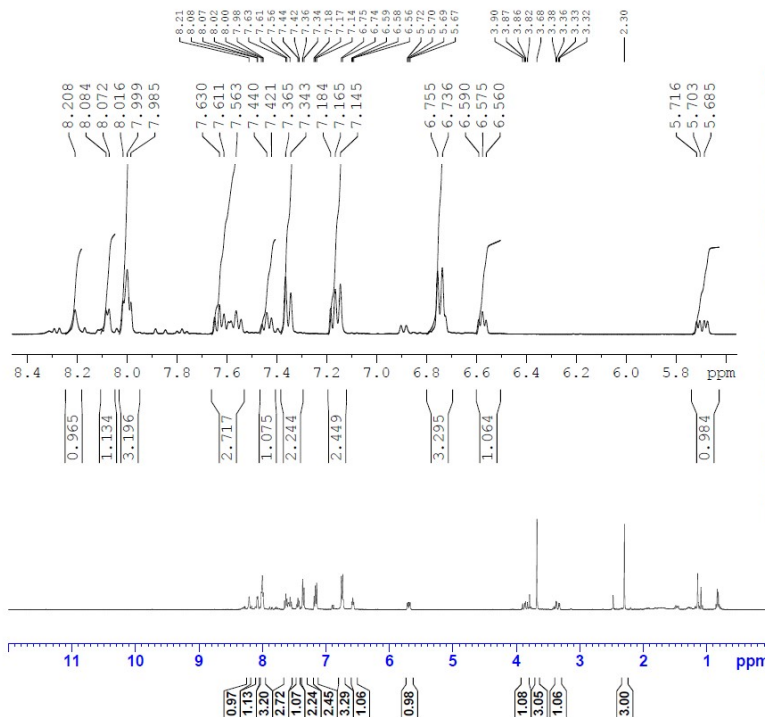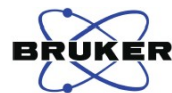

Current Data Parameters  
NAME Dec17-2024-Alex  
EXPNO 60  
PROCNO 1

F2 - Acquisition Parameters  
Date\_ 20241217  
Time 14.16 h  
INSTRUM av400  
PROBHD Z104450\_0135 ( )  
PULPROG zgpg30  
TD 65536  
SOLVENT CDCl3  
NS 16  
DS 4  
SWH 6410.256 Hz  
FIDRES 0.195625 Hz  
AQ 5.1118078 sec  
RG 209.43  
DW 78.000 usec  
DE 6.50 usec  
TE 298.2 K  
D1 1.00000000 sec  
TD0 1  
SF01 400.1924011 MHz  
NUC1 1H  
P0 5.00 usec  
P1 15.00 usec  
PLW1 11.09700012 W

F2 - Processing parameters  
SI 32768  
SF 400.1900395 MHz  
WDW EM  
SSB 0  
LB 0.30 Hz  
GB 0  
PC 1.00

<sup>1</sup>H NMR (400 Mhz) of **P1** in CDCl<sub>3</sub>

C13CPD512.CMDnp CDCl3 {C:\Bruker\TopSpin3.6.5} nmrsu 14

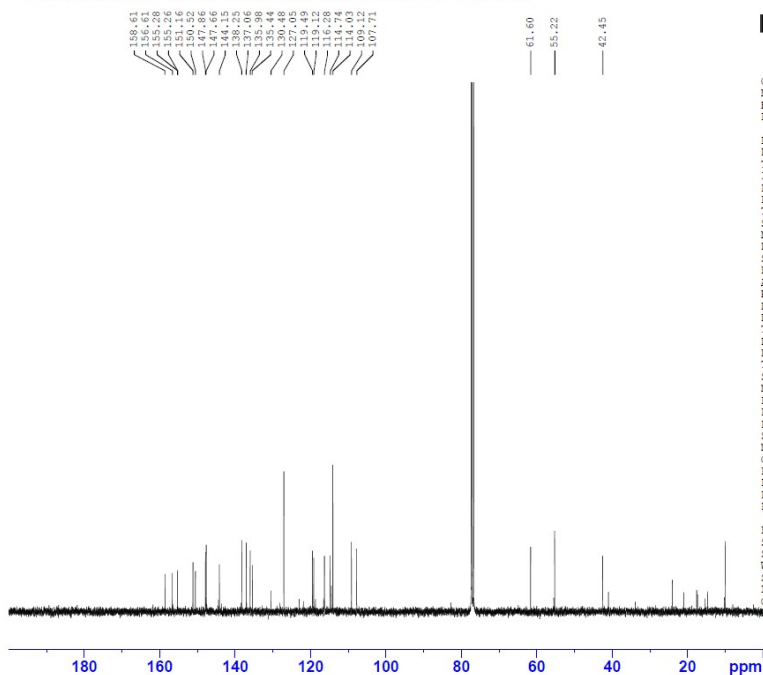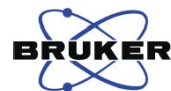

Current Data Parameters  
NAME Dec17-2024-Alex  
EXPNO 70  
PROCNO 1

F2 - Acquisition Parameters  
Date\_ 20241217  
Time 14.53 h  
INSTRUM av400  
PROBHD Z104450\_0135 ( )  
PULPROG zgpg30  
TD 65536  
SOLVENT CDCl3  
NS 512  
DS 4  
SWH 23148.148 Hz  
FIDRES 0.706425 Hz  
AQ 1.4155777 sec  
RG 209.43  
DW 21.600 usec  
DE 6.50 usec  
TE 298.2 K  
D1 2.00000000 sec  
D11 0.03000000 sec  
TD0 1  
SF01 100.6384215 MHz  
NUC1 13C  
P0 3.33 usec  
P1 10.00 usec  
PLW1 47.94699860 W  
SF02 400.1516008 MHz  
NUC2 1H  
CPDPRG2 waltz16  
PCPD2 90.00 usec  
PLW2 11.09700012 W  
PLW12 0.30825001 W  
PLW13 0.15504999 W

F2 - Processing parameters  
SI 32768  
SF 100.6278555 MHz  
WDW EM  
SSB 0  
LB 1.00 Hz  
GB 0  
PC 1.40

<sup>13</sup>C NMR (100 Mhz) of **P1** in CDCl<sub>3</sub>

3,4 OMe Hydrazone  
 PROTON16.CMDnp CDCl3 {C:\Bruker\TopSpin3.6.5} nmrsu 11

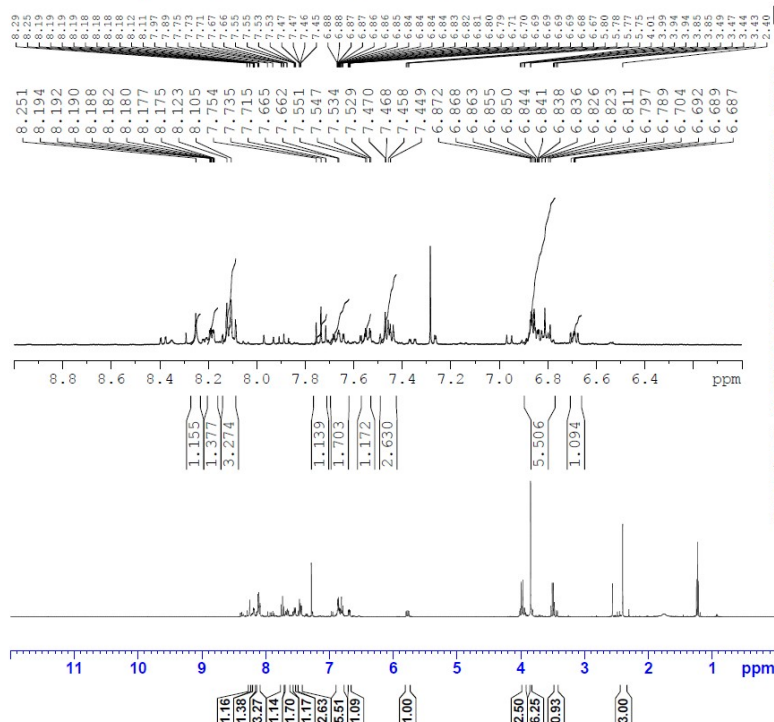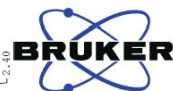

Current Data Parameters  
 NAME Jan10-2025-Alex  
 EXPNO 50  
 PROCNO 1

F2 - Acquisition Parameters  
 Date 20250110  
 Time 15.24 h  
 INSTRUM av400  
 PROBHD Z104450\_0135  
 PULPROG zg30  
 TD 65536  
 SOLVENT CDCl3  
 NS 16  
 DS 2  
 SWH 6410.256 Hz  
 FIDRES 0.195625 Hz  
 AQ 5.1118078 sec  
 RG 209.43  
 DW 78.000 usec  
 DE 6.50 usec  
 TE 298.2 K  
 D1 1.00000000 sec  
 TD0 1  
 SF01 400.1924011 MHz  
 NUC1 1H  
 P0 5.00 usec  
 F1 15.00 usec  
 PLW1 11.09700012 W

F2 - Processing parameters  
 SI 32768  
 SF 400.1900000 MHz  
 WDW EM  
 SSB 0  
 LB 0.30 Hz  
 GB 0  
 PC 1.00

<sup>1</sup>H NMR (400 Mhz) of **P2** in CDCl<sub>3</sub>

3,4 OMe Hydrazone  
 C13CPD512.CMDnp CDCl3 {C:\Bruker\TopSpin3.6.5} nmrsu 11

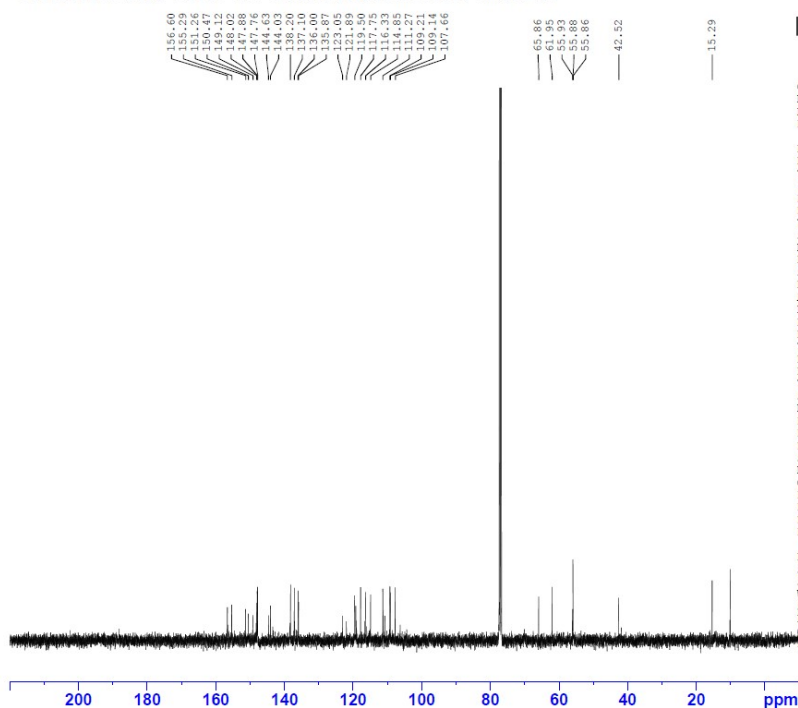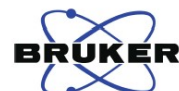

Current Data Parameters  
 NAME Jan10-2025-Alex  
 EXPNO 70  
 PROCNO 1

F2 - Acquisition Parameters  
 Date 20250110  
 Time 16.34 h  
 INSTRUM av400  
 PROBHD Z104450\_0135  
 PULPROG zgpg30  
 TD 65536  
 SOLVENT CDCl3  
 NS 512  
 DS 4  
 SWH 23148.148 Hz  
 FIDRES 0.706425 Hz  
 AQ 1.4155777 sec  
 RG 209.43  
 DW 21.600 usec  
 DE 6.50 usec  
 TE 298.2 K  
 D1 2.00000000 sec  
 D11 0.03000000 sec  
 TD0 1  
 SF01 100.6384215 MHz  
 NUC1 13C  
 P0 3.33 usec  
 F1 10.00 usec  
 PLW1 47.94699860 W  
 SF02 400.1916008 MHz  
 NUC2 1H  
 CPDPRG2 waltz16  
 PCPD2 90.00 usec  
 PLW2 11.09700012 W  
 PLW12 0.30825001 W  
 PLW13 0.15504999 W

F2 - Processing parameters  
 SI 32768  
 SF 100.6278555 MHz  
 WDW EM  
 SSB 0  
 LB 1.00 Hz  
 GB 0  
 PC 1.40

<sup>13</sup>C NMR (100 Mhz) of **P2** in CDCl<sub>3</sub>



4F Hydrazone  
PROTON16.CMDnp CDCl3 {C:\Bruker\TopSpin3.6.5} nmrsu 10

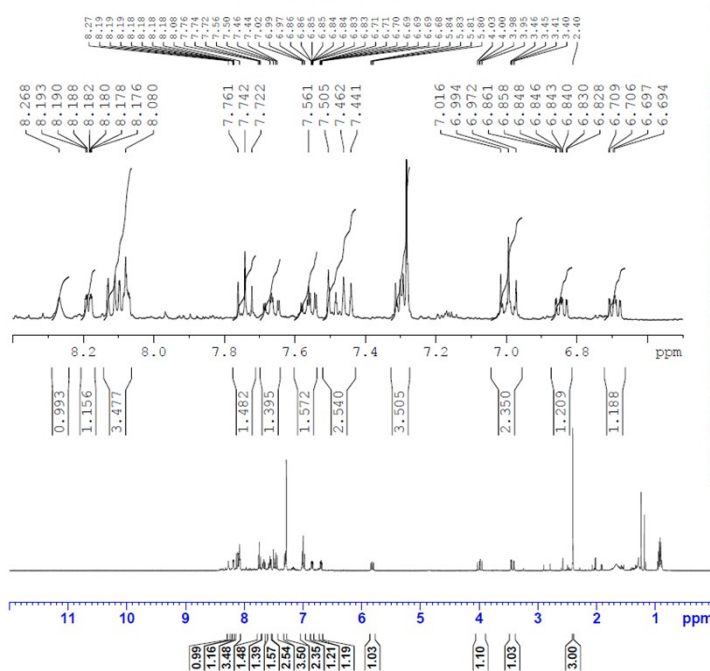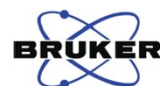

Current Data Parameters  
NAME Jan10-2025-Alex  
EXPNO 40  
PROCNO 1

F2 - Acquisition Parameters  
Date\_ 20250110  
Time\_ 15.16 h  
INSTRUM av400  
PROBHD Z104450\_0135 (   
PULPROG zg30  
TD 65536  
SOLVENT CDCl3  
NS 16  
DS 2  
SWH 6410.256 Hz  
FIDRES 0.195625 Hz  
AQ 5.1118078 sec  
RG 209.43  
DW 76.000 usec  
DE 6.50 usec  
TE 298.2 K  
D1 1.00000000 sec  
D11 1  
D12 1  
SFO1 400.1924011 MHz  
NUC1 1H  
P0 5.00 usec  
P1 15.00 usec  
PLW1 11.09700012 W

F2 - Processing parameters  
SI 32768  
SF 400.1900000 MHz  
WDW EM  
SSB 0  
LB 0.30 Hz  
GB 0  
PC 1.00

<sup>1</sup>H NMR (400 Mhz) of **P4** in CDCl<sub>3</sub>

4F Hydrazone 13C  
C13CPD512.CMDnp CDCl3 {C:\Bruker\TopSpin3.6.5} nmrsu 10

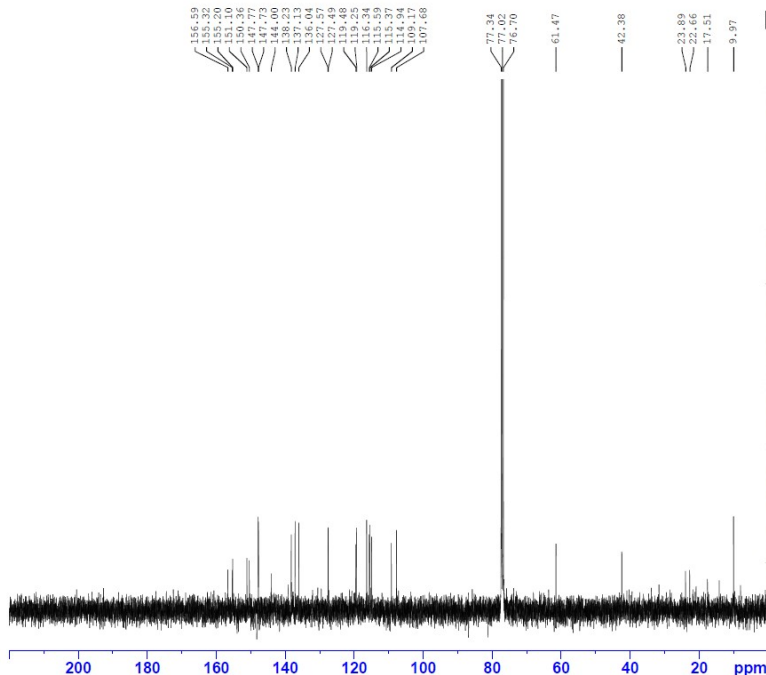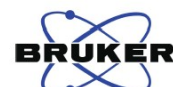

Current Data Parameters  
NAME Jan10-2025-Alex  
EXPNO 60  
PROCNO 1

F2 - Acquisition Parameters  
Date\_ 20250110  
Time\_ 15.59 h  
INSTRUM av400  
PROBHD Z104450\_0135 (   
PULPROG zgpg30  
TD 65536  
SOLVENT CDCl3  
NS 512  
DS 4  
SWH 23148.148 Hz  
FIDRES 0.706425 Hz  
AQ 1.4155777 sec  
RG 209.43  
DW 21.600 usec  
DE 6.50 usec  
TE 298.2 K  
D1 2.00000000 sec  
D11 0.03000000 sec  
D12 1  
D13 1  
SFO1 100.6384215 MHz  
NUC1 13C  
P0 3.33 usec  
P1 10.00 usec  
PLW1 47.94699860 W  
SFO2 400.1816008 MHz  
NUC2 1H  
CPDPRG2 waltz16  
PCPD2 90.00 usec  
PLW2 11.09700013 W  
PLW12 0.30825001 W  
PLW13 0.15504999 W

F2 - Processing parameters  
SI 32768  
SF 100.6278555 MHz  
WDW EM  
SSB 0  
LB 1.00 Hz  
GB 0  
PC 1.40

<sup>13</sup>C NMR (100 Mhz) of **P4** in CDCl<sub>3</sub>

Ph Hydrazone Lower spot  
 PROTON16.CMDnp CDCl<sub>3</sub> (C:\Bruker\TopSpin3.6.5) nmrsu 53

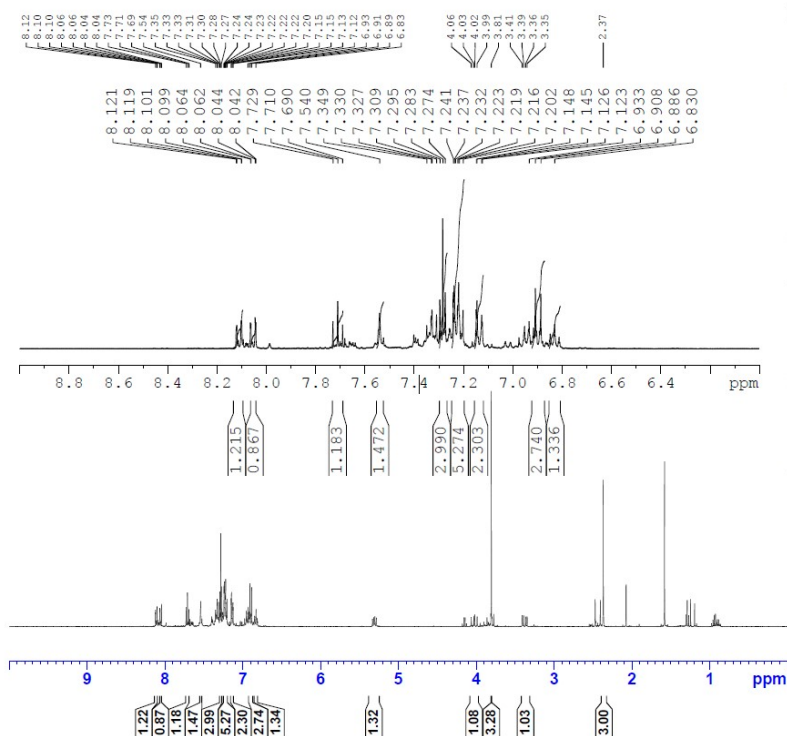

<sup>1</sup>H NMR (400 Mhz) of P5 in CDCl<sub>3</sub>

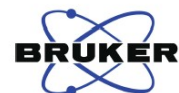

Current Data Parameters  
 NAME Jan15-2025-Alex  
 EXPNO 30  
 PROCNO 1

F2 - Acquisition Parameters  
 Date\_ 20250115  
 Time 13.14 h  
 INSTRUM av400  
 PROBHD Z104450\_0135 ( )  
 PULPROG zg30  
 TD 65536  
 SOLVENT CDCl<sub>3</sub>  
 NS 16  
 DS 2  
 SWH 6410.256 Hz  
 FIDRES 0.195625 Hz  
 AQ 5.1118078 sec  
 RG 209.43  
 DW 78.000 usec  
 DE 6.50 usec  
 TE 298.2 K  
 D1 1.00000000 sec  
 TD0 1  
 SFO1 400.1924011 MHz  
 NUC1 1H  
 P0 5.00 usec  
 PL1 15.00 usec  
 PLW1 11.09700012 W

F2 - Processing parameters  
 SI 32768  
 SF 400.1900000 MHz  
 WDW EM  
 SSB 0  
 LB 0.30 Hz  
 GB 0  
 PC 1.00

Ph Hydrazone  
 C13CPD512.CMDnp CDCl<sub>3</sub> (C:\Bruker\TopSpin3.6.5) nmrsu 53

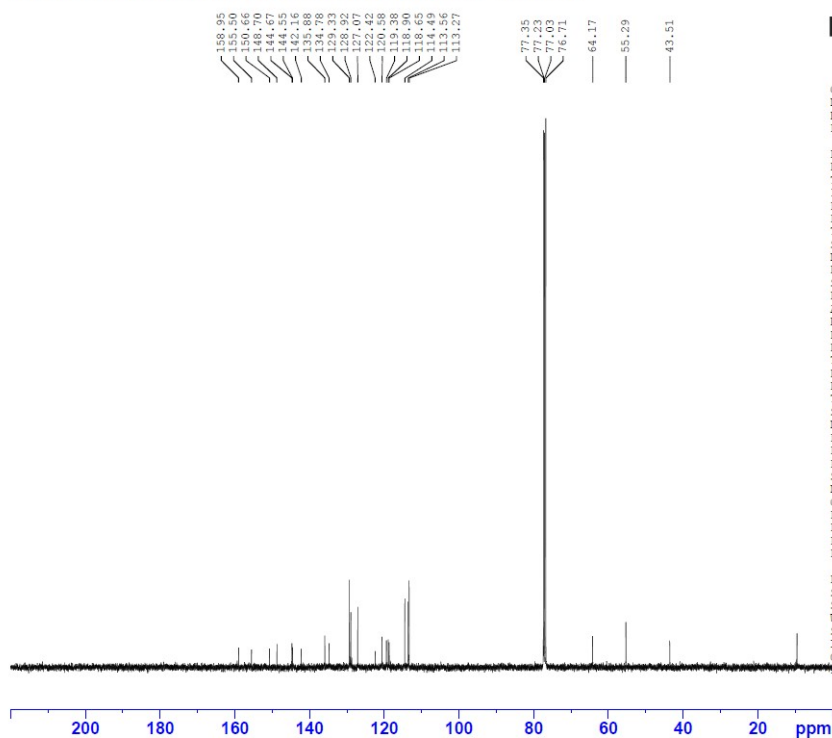

<sup>13</sup>C NMR (100 Mhz) of P5 in CDCl<sub>3</sub>

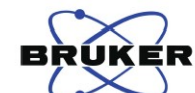

Current Data Parameters  
 NAME Jan15-2025-Alex  
 EXPNO 40  
 PROCNO 1

F2 - Acquisition Parameters  
 Date\_ 20250115  
 Time 14.32 h  
 INSTRUM av400  
 PROBHD Z104450\_0135 ( )  
 PULPROG zgpg30  
 TD 65536  
 SOLVENT CDCl<sub>3</sub>  
 NS 512  
 DS 4  
 SWH 23149.148 Hz  
 FIDRES 0.706425 Hz  
 AQ 1.4155777 sec  
 RG 209.43  
 DW 21.600 usec  
 DE 6.50 usec  
 TE 298.2 K  
 D1 2.00000000 sec  
 D11 0.03000000 sec  
 TD0 1  
 SFO1 100.6384215 MHz  
 NUC1 13C  
 P0 3.33 usec  
 PL1 10.00 usec  
 PLW1 47.94699860 W  
 SFO2 400.1916008 MHz  
 NUC2 1H  
 CPDPRG2 waltz16  
 PCPD2 90.00 usec  
 PLW2 11.09700012 W  
 PLW12 0.30825001 W  
 PLW13 0.15504999 W

F2 - Processing parameters  
 SI 32768  
 SF 100.6278555 MHz  
 WDW EM  
 SSB 0  
 LB 1.00 Hz  
 GB 0  
 PC 1.40





## Limit of Detection (LoD) Studies (S4)

The method reported by Lee *et al* was used to calculate limit of detection (LoD) for **P1** ( $\lambda_{\text{ex}}$  285 nm) in 7:3 MeCN:H<sub>2</sub>O with the average from two replicates used.

$$\text{LoD} = 3\sigma_{\text{bi}}/m$$

$\sigma_{\text{bi}}$  = standard deviation of sensor only (n=10)

m = gradient of the slope

B. P. Joshi, J. Park, W. I. Lee and K.-H. Lee, Talanta, 2009, 78, 903.

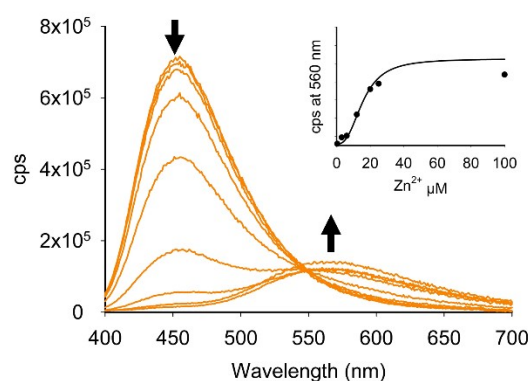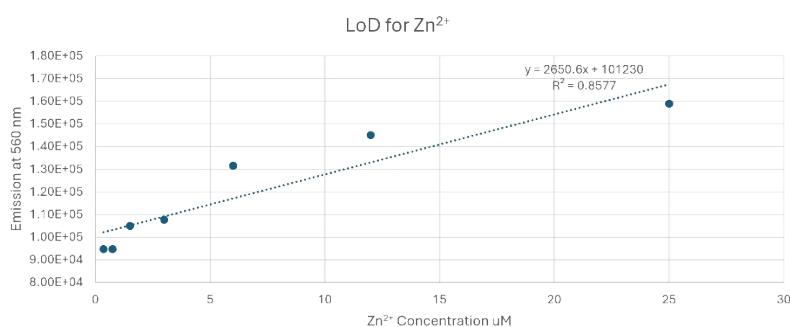

Limit of detection study for **P1** with Zn<sup>2+</sup> (0.35, 0.7, 1.5, 3, 6, 12, 25 μM) with  $\lambda_{\text{em}}$  560 nm. Values are the average of two independent experiments. Standard deviation of blanks (n= 10) at 560 nm = 5705. Zn<sup>2+</sup> LoD calculated at 6.4 μM.

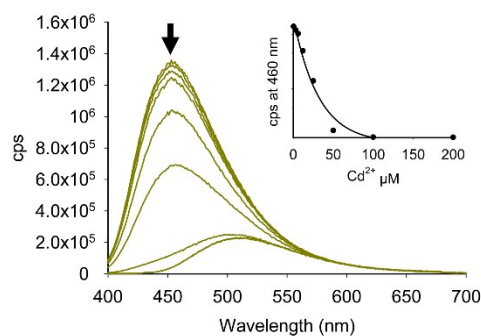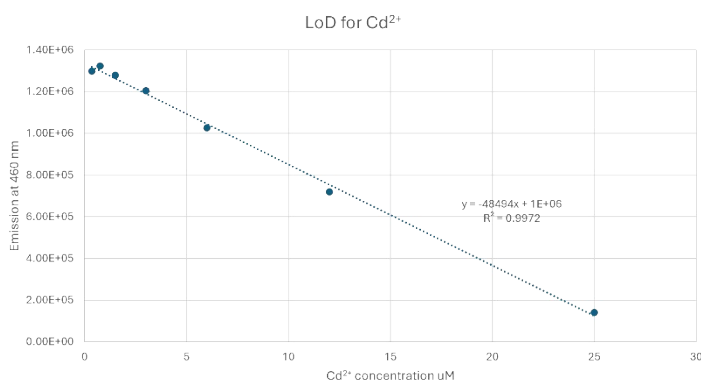

Limit of detection study for **P1** with Cd<sup>2+</sup> (0.35, 0.7, 1.5, 3, 6, 12, 25 μM) with  $\lambda_{\text{em}}$  460 nm. Values are the average of two independent experiments. Standard deviation of blanks (n= 10) at 460 nm = 39048. Cd<sup>2+</sup> LoD calculated at 2.4 μM.

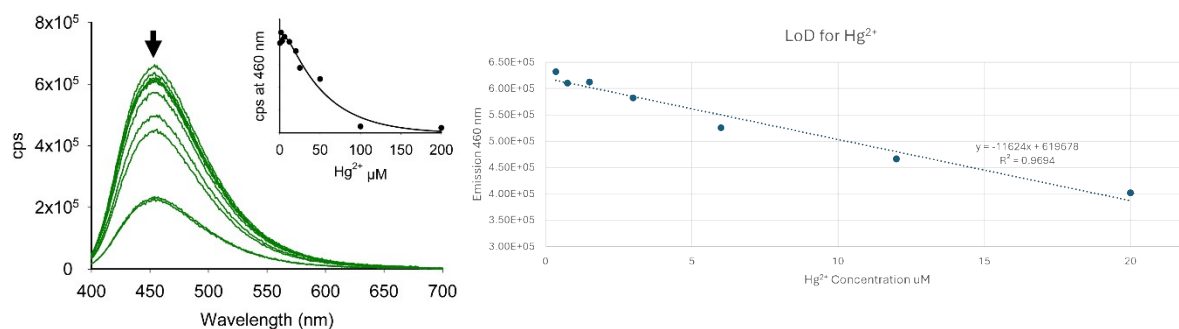

Limit of detection study for **P1** with  $\text{Hg}^{2+}$  (0.35, 0.7, 1.5, 3, 6, 12, 20  $\mu\text{M}$ ) with  $\lambda_{\text{em}}$  460 nm. Values are the average of two independent experiments. Standard deviation of blanks ( $n=10$ ) at 460 nm = 39048.  $\text{Hg}^{2+}$  LoD calculated at 10.0  $\mu\text{M}$ .

## Metal Screen for P2-P5 (S5)

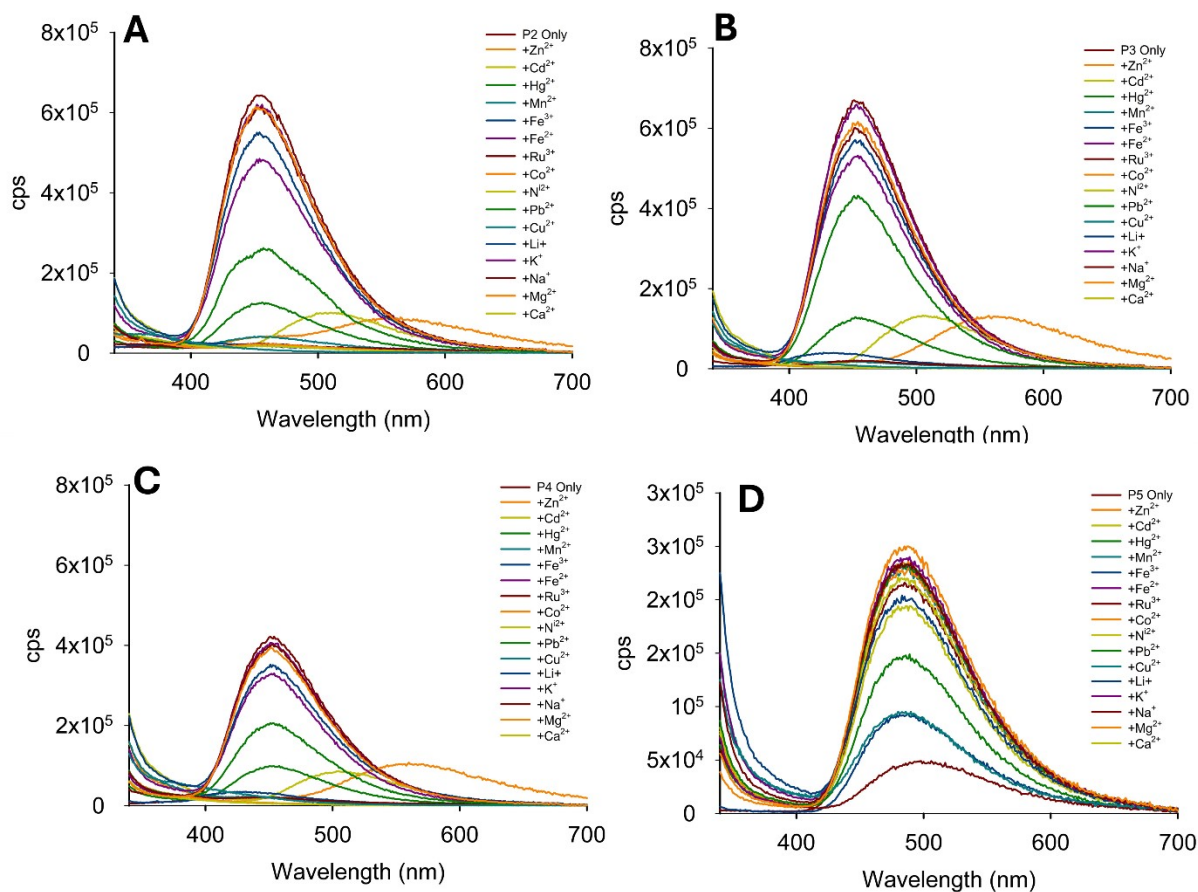



## Limit of Detection (LoD) for literature pyrazolines (S6)

| Sensor                                                                                        | Solvent                          | Zn <sup>2+</sup><br>LoD | Cd <sup>2+</sup><br>LoD | Reference                                                                             |
|-----------------------------------------------------------------------------------------------|----------------------------------|-------------------------|-------------------------|---------------------------------------------------------------------------------------|
| <b>S1</b> 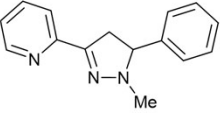   | 100% MeCN                        | 0.2 μM                  | 0.12 μM                 | <i>Org. Biomol. Chem.</i> , 2012, <b>10</b> , 8753                                    |
| <b>S2</b>    | 100% MeCN                        | 0.03 μM                 | -                       | <i>RSC Adv.</i> , 2024, <b>14</b> , 3519                                              |
| <b>S3</b>    | 50% H <sub>2</sub> O<br>50% MeCN | 0.12 μM                 | -                       | <i>Sensors and Actuators B</i> , 2011, <b>159</b> , 148                               |
| <b>S4</b>   | 50% H <sub>2</sub> O<br>50% EtOH | 0.93 μM                 | 0.82 μM                 | <i>Inorganic Chemistry Communications</i> , 2021, <b>130</b> , 108735                 |
| <b>S5</b>  | 50% H <sub>2</sub> O<br>50% EtOH | 0.16 μM                 | -                       | <i>Inorganica Chimica Acta</i> , 2018, <b>479</b> , 128                               |
| <b>S6</b>  | CH <sub>2</sub> Cl <sub>2</sub>  | 1.4 μM                  | -                       | <i>Eur. J. Inorg. Chem.</i> 2013, 6019                                                |
| <b>S7</b>  | 90% MeCN<br>10% EtOH             | 0.4 μM                  | -                       | <i>Journal of Photochemistry and Photobiology A: Chemistry</i> , 2011, <b>218</b> , 6 |
| <b>S8</b>  | 50% H <sub>2</sub> O<br>50% EtOH | 0.03 μM                 | -                       | <i>Anal. Methods</i> , 2018, <b>10</b> , 1833                                         |

## Job Plot for P1 with Zn<sup>2+</sup> (S7)

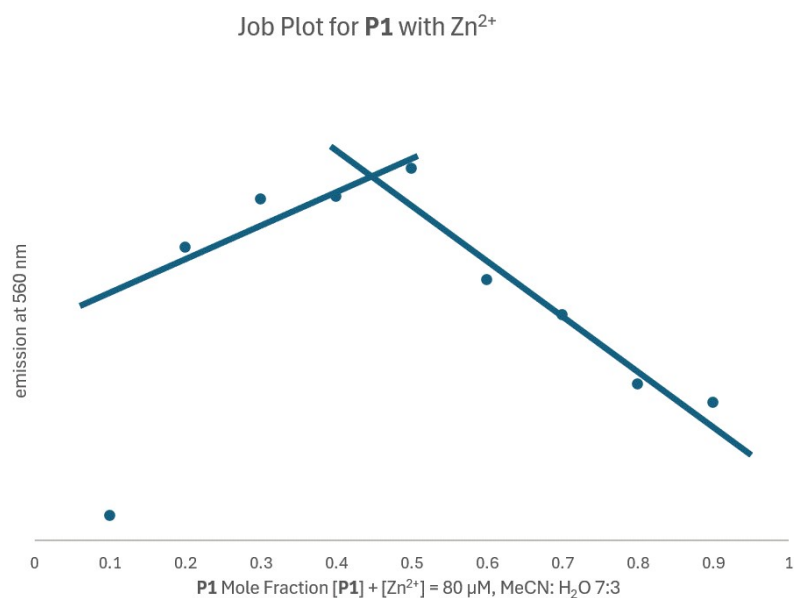

Job Plot for P1 with Zn<sup>2+</sup>,  $\lambda_{\text{ex}}$  295 nm,  $\lambda_{\text{em}}$  560 nm, total concentration was 80  $\mu\text{M}$  in a 7:3 MeCN: H<sub>2</sub>O.

## *In situ* monitoring using prototype portable device (S8):

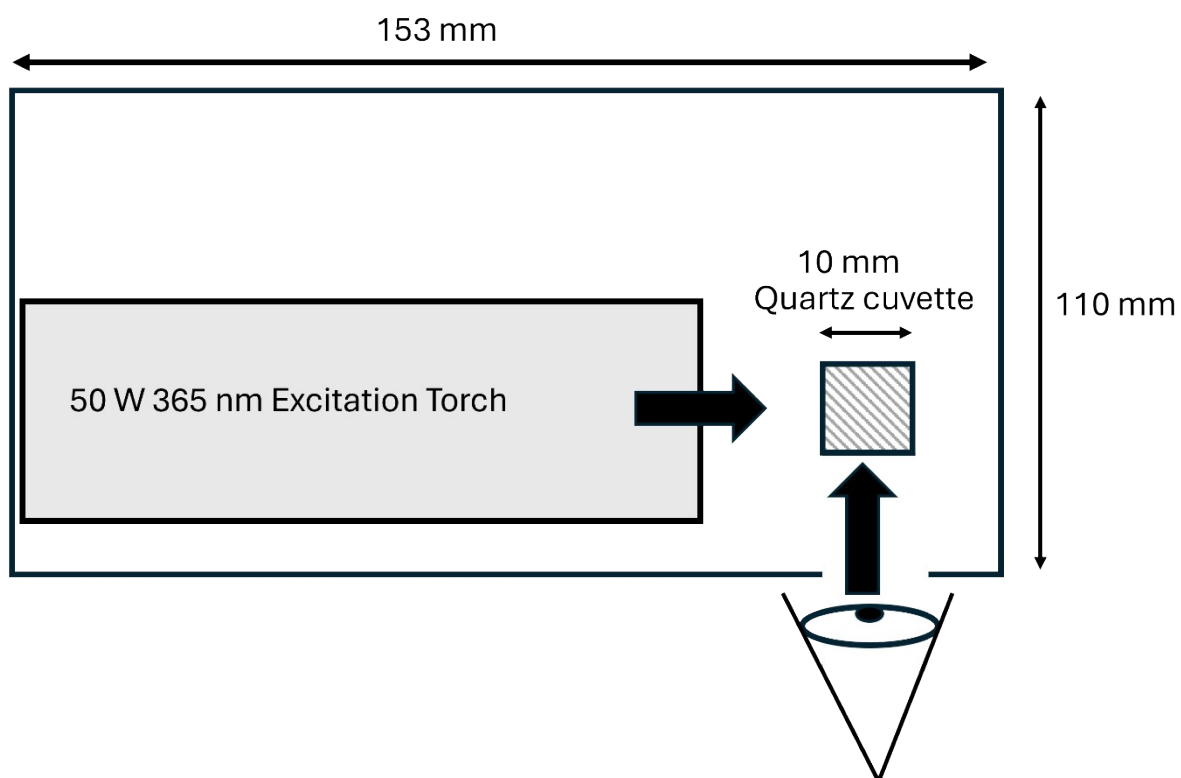

Torch used:

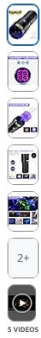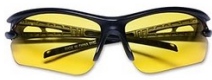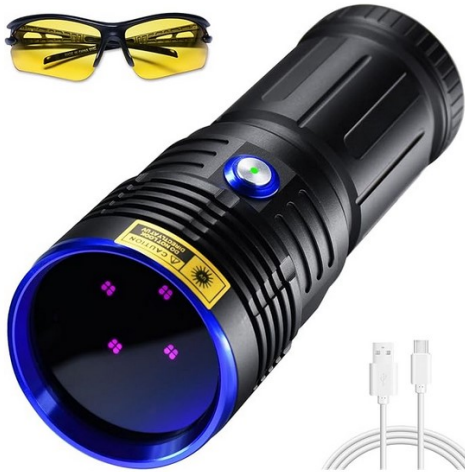

Roll over image to zoom in

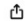

## DARKBEAM UV Torch 365nm Flashlight Wood's lamp, Rechargeable Blacklight 50W Powerful, LED Ultraviolet USB-C Black Light Portable Pet Urine Detector for Resin Curing, Ore, Leak Detection [Energy Class A]

Brand: DARKBEAM

4.2 ★★★★★ (17)

1 sustainability feature

£59<sup>99</sup>

[FREE Returns](#)

Get a £20 Amazon Gift Card if approved for The Amazon Barclaycard. [Apply now.](#) Representative 28.9% APR variable. Credit broker: Amazon EU S.A.R.L. Lender: Barclays. T&Cs apply.

|                          |                                                                                                                                        |
|--------------------------|----------------------------------------------------------------------------------------------------------------------------------------|
| <b>Special feature</b>   | 3D print, UV resin curing, Pet Dog Urine Detection, Scorpions, Uranium glass, invisible ink, Woods lamp for Cat Ringworm/ Pee Detector |
| <b>Colour</b>            | Uv 365nm(bluish)                                                                                                                       |
| <b>Power source</b>      | Battery Powered                                                                                                                        |
| <b>Light source type</b> | UV                                                                                                                                     |
| <b>Material</b>          | Aluminium                                                                                                                              |

### About this item

- Higher Power, more practical UV torch: This is a spotlight blacklight that integrates high purity, high intensity and long range. Filtered and pure uv 365nm ultraviolet, unlike ordinary unfiltered 365 UV light. 4 LEDs powerful uv light, with high power of 50W and 2150mW radiant intensity. More than 70 feet beam distance, easily find what you're looking for (No need to get too close or squat). It also has a USB-C direct charging function, Using rechargeable battery power
- Professional filtered uv 365nm light: Equipped with hard toughened black filter optical lens that can filter out disturbing visible light, and release purer invisible UV365 light, which is suitable for more professional detection needs.
